# Supplementary material for: Acupuncture for Managing Cancer-Related Fatigue in Breast Cancer Patients: A Systematic Review and Meta-Analysis
Source: MDPI journal article supplement (doi:10.3390/cancers14184419), 2022-09-11

**Table S1.** Search strategy

---

**1. PubMed**

---

#1. (“fatigue”[MeSH Terms]) OR (lassitude[MeSH Terms])

#2. ((((((“fatigue”[Title/Abstract]) OR (lassitude[Title/Abstract])) OR (tired\*[Title/Abstract])) OR (“weary”[Title/Abstract])) OR (“weariness”[Title/Abstract])) OR (exhaust\*[Title/Abstract])) OR (“lacklustre”[Title/Abstract]))

#3. #1 OR #2

#4. breast neoplasms[MeSH Terms]

#5. (((((((“breast neoplasms”[Title/Abstract]) OR (“breast neoplasm”[Title/Abstract])) OR (“breast tumors”[Title/Abstract])) OR (“breast tumor”[Title/Abstract])) OR (“breast cancer”[Title/Abstract])) OR (“breast carcinoma”[Title/Abstract])) OR (“mammary tumor”[Title/Abstract])) OR (“mammary cancers”[Title/Abstract]))

#6. #4 OR #5

#7. #3 AND #6

#8. (“acupuncture”[MeSH]) OR (“acupuncture therapy”[MeSH]) OR (“acupuncture points”[MeSH]) OR (electroacupuncture”[MeSH])OR (“acupuncture, ear” [MeSH])

#9. (“acupuncture”[Title/Abstract]) OR (“electroacupuncture”[Title/Abstract]) OR (“electro-acupuncture” [Title/Abstract]) OR (“auricular acupuncture”[Title/Abstract]) OR (“scalp acupuncture”[Title/Abstract]) OR (“dry needling” [Title/Abstract])

#10. #8 OR #9

#11. #7 AND #10

---

**2. CNKI**

---

#1. 乳腺肿瘤 OR 乳腺癌

#2. 疲乏 OR 疲劳 OR 疲倦

#3. #1 AND #2

#4. 针刺 OR 针灸 OR 电针 OR 耳针 OR 头针

#5. #3 AND #4

#6. 随机 OR 对照

#7. #5 AND #6

---

**3. RISS, KISS, OASIS, KTKP**

---

#1. 유방암 AND 피로 AND 침

#2. breast cancer AND fatigue AND acupuncture

#3. #1 OR #2

---

**Table S2.** Descriptions of the acupuncture interventions according to the revised STRICTA.

| First Author<br>(year) (Ref) | Acupuncture<br>Rationale       | Details of needling |                                                                        |                       |                    |                       |                             |                                      | Treatment<br>Regime<br>(Total session)/<br>Follow-up                         | Other<br>components<br>of treatment | Practitioner<br>background   | Control or<br>Comparator<br>intervention                |
|------------------------------|--------------------------------|---------------------|------------------------------------------------------------------------|-----------------------|--------------------|-----------------------|-----------------------------|--------------------------------------|------------------------------------------------------------------------------|-------------------------------------|------------------------------|---------------------------------------------------------|
|                              |                                | Number<br>of needle | Names of acupoints                                                     | Depth of<br>Insertion | Response<br>sought | Needle<br>stimulation | Needle<br>retention<br>time | Needle type                          |                                                                              |                                     |                              |                                                         |
| Li (2020) [34]               | TCM theory                     | NR                  | NR                                                                     | NR                    | NR                 | Manual                | 30 min                      | 0.25 mm × (25 mm/50 mm)              | Once weekly for 20 weeks (20 sessions)/ NR                                   | NA                                  | Acupuncturists               | Sham AT (non-insertive stimulation at non-AT points)    |
| Smith (2013) [35]            | TCM theory                     | NR                  | KI3, KI27, ST36, SP6, CV4, CV6                                         | 0.5-4.0 cun           | De qi              | Manual                | 20 ~ 40 min                 | (0.22 mm/0.25 mm) × (25 mm/40 mm)    | Twice weekly for 3 weeks and once weekly for 3 weeks (9 sessions)/ NR        | UC                                  | Acupuncturists               | Sham AT (non-insertive stimulation at non-AT points) UC |
| Mao (2014) [36]              | TCM theory                     | NR                  | SP6, ST36                                                              | NR                    | De qi              | TENS                  | 30 min                      | 0.25 mm × (30 mm/40 mm)              | Twice weekly for 2 weeks and once weekly for 6 weeks (10 sessions)/ 12 weeks | UC                                  | Acupuncturists (8, 20 years) | Sham AT (non-insertive stimulation at non-AT points) UC |
| Zhang (2019) [37]            | TCM theory                     | NR                  | ST36, SP10, CV17, CV12, GV20 CV7, GV16, BL15, BL45, HT5, KI6           | 0.5-1.5 cun           | De qi              | Manual                | 20 min                      | 0.25 mm × (20 mm/40 mm)              | Twice weekly for 8 weeks (16 sessions)/ 16 weeks                             | NA                                  | NR                           | Sham AT (non-insertive stimulation at non-AT points)    |
| Yu (2017) [38]               | TCM theory                     | NR                  | GV20, PC6, CV6, ST36, SP6                                              | NR                    | De qi              | Manual                | NR                          | NR                                   | Twice weekly for 4 weeks (8 sessions)/ 4 weeks                               | NA                                  | NR                           | Sham AT (non-insertive stimulation at non-AT points)    |
| Chen (2016) [39]             | TCM theory                     | NR                  | GV20, HT7, GV4, GB39, SP6, ST36, SP10                                  | NR                    | De qi              | Manual                | 30 min                      | NR                                   | Once daily for 10 days, rest 2 days, total 2 courses (20 sessions)/ NR       | UC                                  | NR                           | UC                                                      |
| Molassiotis (2013) [40]      | TCM theory                     | NR                  | LI4, SP6, ST36                                                         | 0.5-1.0 cun           | De qi              | Manual                | 20 min                      | 36 gauge × (16 to 30 mm)             | Once weekly for 10 weeks (10 sessions)/ NR                                   | UC                                  | Acupuncturists               | UC                                                      |
| Brinkhaus (2019) [41]        | TCM theory                     | NR                  | PC6, ST36, ST44, CV10, CV12, ST42, LI11, LI10, GV20, CV4, CV6          | NR                    | De qi              | Manual                | NR                          | NR                                   | NR for 6 months (least 6 sessions)/ NR                                       | UC                                  | Acupuncturists (30 years)    | UC                                                      |
| Zhou (2018) [42]             | TCM theory                     | NR                  | Sishen, SP6, ST36, LR3, LR5                                            | 0.5-1.0 cun           | De qi              | Manual                | 30 min                      | 0.25 mm × 25 mm                      | Third weekly for 5 weeks (15 sessions)/ NR                                   | NA                                  | NR                           | UC                                                      |
| Molassiotis (2012) [43]      | TCM theory                     | NR                  | LI4, SP6, ST36                                                         | 0.5-1.0 cun           | De qi              | Manual                | 20 min                      | 36 gauge × (16 to 30 mm)             | Once weekly for 6 weeks (6 session)/ NR                                      | UC                                  | Acupuncturists               | UC                                                      |
| Johnston (2011) [44]         | TCM theory/clinical experience | NR                  | KI 3, LI4, SP6, ST36, SP6, SP4, LU7, KI4, EX-HN3, GV20, HT7, KI4, BL62 | 0.5-1.5 cun           | De qi              | Manual                | 30min                       | (32, 34, 38 gauge) × (0.5 to 1.5cun) | Once weekly for 8 weeks (8 session)/ NR                                      | UC                                  | Acupuncturists (20 years)    | Self-care training                                      |
| Zhu (2016) [45]              | TCM theory                     | NR                  | ST36, SP10, CV4, SP6, BL23, BL19                                       | NR                    | De qi              | Manual                | 30 min                      | NR                                   | Once for 5 days (5 session)/ NR                                              | NR                                  | NR                           | UC                                                      |

NR: Not Reported; TCM: Traditional Chinese Medicine; TENS transcutaneous electrical nerve stimulation

**Figure S1.** Most frequently used acupoints.

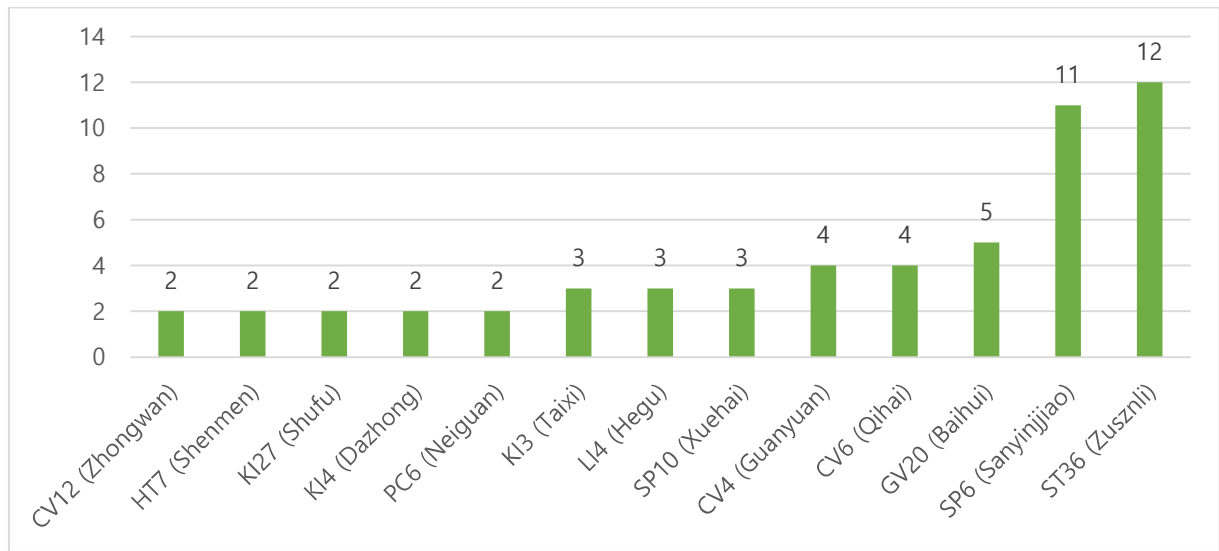

Supplement: s1 [file s1]
